# Supplementary material for: C. elegans avoids toxin-producing Streptomyces using a seven transmembrane domain chemosensory receptor
Source: eLife. 2017 Sep 5;6:e23770. doi: 10.7554/eLife.23770 (PMC5584987; doi:10.7554/eLife.23770)
Supplement: Figure 1—source data 1. [file elife-23770-fig1-data1.xlsx]

## Sheet: Sheet1
Figure		Treatment	Mean Relative Response index	Percent Sensed	Mean Chemotaxis Index	Median of Chemotaxis Index	Standard Error of the Mean	Statistical Test(s) and Comparison	Method of Multiple Test Correction	Post-hoc test-adjusted p-value	N
1	C	All						1-way ANOVA		2e-16	880
1	C	Saline buffer	3.24				0.063	1-way ANOVA, Tukey HSD, compared with samples below	Tukey HSD	See below	280
1	C	E. coli	2.77				0.153456	1-way ANOVA, Tukey HSD, compared with buffer	Tukey HSD	0.01	40
1	C	E. coli	2.77				0.153456	1-way ANOVA, Tukey HSD, compared with SDS	Tukey HSD	0	40
1	C	B. subtilis	3.27				0.118409	1-way ANOVA, Tukey HSD, compared with buffer	Tukey HSD	1	40
1	C	B. subtilis	3.27				0.118409	1-way ANOVA, Tukey HSD, compared with SDS	Tukey HSD	0	40
1	C	SDS	1				0.0262774	1-way ANOVA, Tukey HSD, compared with buffer	Tukey HSD	0	280
1	C	S. avermitilis	1.1				0.0879962	1-way ANOVA, Tukey HSD, compared with buffer	Tukey HSD	0	40
1	C	S. avermitilis	1.1				0.0879962	1-way ANOVA, Tukey HSD, compared with SDS	Tukey HSD	1	40
1	C	S. avermitilis cell-free sup	0.92				0.0990355	1-way ANOVA, Tukey HSD, compared with buffer	Tukey HSD	0	40
1	C	S. avermitilis cell-free sup	0.92				0.0990355	1-way ANOVA, Tukey HSD, compared with SDS	Tukey HSD	1	40
1	C	S. costaricanus	0.88				0.076897	1-way ANOVA, Tukey HSD, compared with buffer	Tukey HSD	0	40
1	C	S. costaricanus	0.88				0.076897	1-way ANOVA, Tukey HSD, compared with SDS	Tukey HSD	1	40
1	C	S. costaricanus cell-free sup	1.13				0.0923368	1-way ANOVA, Tukey HSD, compared with buffer	Tukey HSD	0	40
1	C	S. costaricanus cell-free sup	1.13				0.0923368	1-way ANOVA, Tukey HSD, compared with SDS	Tukey HSD	0.94	40
1	C	S. milbemycinicus	1.03				0.0703776	1-way ANOVA, Tukey HSD, compared with buffer	Tukey HSD	0	40
1	C	S. milbemycinicus	1.03				0.0703776	1-way ANOVA, Tukey HSD, compared with SDS	Tukey HSD	1	40
1	C	S. milbemycinicus cell-free sup	1.04				0.0794644	1-way ANOVA, Tukey HSD, compared with buffer	Tukey HSD	0	40
1	C	S. milbemycinicus cell-free sup	1.04				0.0794644	1-way ANOVA, Tukey HSD, compared with SDS	Tukey HSD	1	40
1	E	Saline buffer		0.162			NA	z-test, compared with samples below	Hochberg	See below	246
1	E	E. coli		0.32			NA	z-test, compared with buffer	Hochberg	0.069	41
1	E	E. coli		0.32			NA	z-test, compared with SDS	Hochberg	0	41
1	E	B. subtilis		0.03			NA	z-test, compared with buffer	Hochberg	0.069	40
1	E	B. subtilis		0.03			NA	z-test, compared with SDS	Hochberg	0	40
1	E	SDS		0.96			NA	z-test, compared with buffer	Hochberg	0	80
1	E	S. avermitilis		0.85			NA	z-test, compared with buffer	Hochberg	0	40
1	E	S. avermitilis		0.85			NA	z-test, compared with SDS	Hochberg	0.069	40
1	E	S. costaricanus		0.87			NA	z-test, compared with buffer	Hochberg	0	40
1	E	S. costaricanus		0.87			NA	z-test, compared with SDS	Hochberg	0.07	40
1	E	S. milbemycinicus		0.93			NA	z-test, compared with buffer	Hochberg	0	40
1	E	S. milbemycinicus		0.93			NA	z-test, compared with SDS	Hochberg	0.374	40
1S1	B	All						1-way ANOVA		1.5e-05	29
1S1	B	Diacetyl			0.5	0.466	0.107738	1-way ANOVA, Tukey HSD, compared with samples below	Tukey HSD	See below	2785
											(8 assay plates)
1S1	B	S. avermitilis			-0.089	-0.056	0.0829237	1-way ANOVA, Tukey HSD, compared with diacetyl	Tukey HSD	0.0007602	2150
											(8 assay plates)
1S1	B	E. coli			0.12	0.053	0.115258	1-way ANOVA, Tukey HSD, compared with diacetyl	Tukey HSD	0.0339835	1599
											(9 assay plates)
1S1	B	B. subtilis			-0.057	-0.093	0.0583488	1-way ANOVA, Tukey HSD, compared with diacetyl	Tukey HSD	0.0031301	1694
											(6 assay plates)
