# Supplementary material for: C. elegans avoids toxin-producing Streptomyces using a seven transmembrane domain chemosensory receptor
Source: eLife. 2017 Sep 5;6:e23770. doi: 10.7554/eLife.23770 (PMC5584987; doi:10.7554/eLife.23770)
Supplement: Figure 1—source data 2. [file elife-23770-fig1-data2.xlsx]

## Sheet: Sheet1
Pairwise Comparisons for Figure 1C
	saline buffer	E. coli	B. subtilis	SDS	S. avermitilis	S. avermitilis cell-free sup	S. costaricanus	S. costaricanus cell-free sup	S. milbemycinicus	S. milbemycinicus cell-free sup
saline buffer
E. coli	0.0103
B. subtilis	1	0.0992
SDS	0	0	0
S. avermitilis	0	0	0	1
S. avermitilis cell-free sup	0	0	0	1	0.986
S. costaricanus	0	0	0	1	0.951	1
S. costaricanus cell-free sup	0	0	0	0.9446	0.8453	1	1
S. milbemycinicus	0	0	0	1	1	1	1	0.9677
S. milbemycinicus cell-free sup	0	0	0	1	1	1	1	0.965	1
Pairwise Comparisons for Figure 1E
	saline buffer	E. coli	B. subtilis	SDS	S. avemitilis	S. costaricanus	S. milbemycinicus
saline buffer
E. coli	0.069
B. subtilis	0.069	0.0037
SDS	0	0	0
S. avermitilis	0	2.2e-05	0	0.069
S. costaricanus	0	5.1e-07	0	0.07	0.75
S. milbemycinicus	0	3e-08	0	0.37	0.29	0.046
