# Supplementary material for: C. elegans avoids toxin-producing Streptomyces using a seven transmembrane domain chemosensory receptor
Source: eLife. 2017 Sep 5;6:e23770. doi: 10.7554/eLife.23770 (PMC5584987; doi:10.7554/eLife.23770)
Supplement: Figure 2—source data 1. [file elife-23770-fig2-data1.xlsx]

## Sheet: Sheet1
Figure		Treatment	Mean Relative Response index	Percent Sensed	Mean Chemotaxis Index	Standard Error of the Mean	Statistical Test(s) and Comparison	Method of Multiple Test Correction	Post-hoc test-adjusted p-value	N
2	B	All					1-way ANOVA		2e-16	360
2	B	Saline buffer	3.2			0.0644677	1-way ANOVA, Tukey HSD, compared with samples below	Tukey HSD	See below	120
2	B	3.4mM SDS	0.87			0.0420371	1-way ANOVA, Tukey HSD, compared with buffer	Tukey HSD	0	80
2	B	0.6mM SDS	1			0.0367883	1-way ANOVA, Tukey HSD, compared with buffer	Tukey HSD	0	120
2	B	0.6mM SDS	1			0.0367883	1-way ANOVA, Tukey HSD, compared with 3.4 mM SDS	Tukey HSD	0.48	120
2	B	0.6mM Triton X-100	2.83			0.0688094	1-way ANOVA, Tukey HSD, compared with buffer	Tukey HSD	0.00052	40
2	B	0.6mM Triton X-100	2.83			0.0688094	1-way ANOVA, Tukey HSD, compared with 3.4 mM SDS	Tukey HSD	0	40
2	C	All					1-way ANOVA		2e-16	240
2	C	Saline buffer	3.765			0.177016	1-way ANOVA, Tukey HSD, compared with samples below	Tukey HSD	See below	80
2	C	SDS	1			0.0702253	1-way ANOVA, Tukey HSD, compared with buffer	Tukey HSD	0	80
2	C	sodium hexyl sulfate	2.23			0.279411	1-way ANOVA, Tukey HSD, compared with buffer	Tukey HSD	3e-07	40
2	C	sodium hexyl sulfate	2.23			0.279411	1-way ANOVA, Tukey HSD, compared with SDS	Tukey HSD	5.2e-05	40
2	C	1-dodecanol	3.45			0.364226	1-way ANOVA, Tukey HSD, compared with buffer	Tukey HSD	0.65	40
2	C	1-dodecanol	3.45			0.364226	1-way ANOVA, Tukey HSD, compared with SDS	Tukey HSD	0	40
2	D	All					1-way ANOVA		2e-16	1613
2	D	Saline buffer	2.961			0.037293	1-way ANOVA, Tukey HSD, compared with samples below	Tukey HSD	See below	520
2	D	SDS	1			0.022219	1-way ANOVA, Tukey HSD, compared with buffer	Tukey HSD	0	493
2	D	dodecanoate	1.59293			0.05926	1-way ANOVA, Tukey HSD, compared with buffer	Tukey HSD	0	120
2	D	dodecanoate	1.59293			0.05926	1-way ANOVA, Tukey HSD, compared with SDS	Tukey HSD	0	120
2	D	undecanoate	2.28			0.119572	1-way ANOVA, Tukey HSD, compared with buffer	Tukey HSD	0.0027	80
2	D	undecanoate	2.28			0.119572	1-way ANOVA, Tukey HSD, compared with SDS	Tukey HSD	0	80
2	D	decanoate	0.95			0.045481	1-way ANOVA, Tukey HSD, compared with buffer	Tukey HSD	0	120
2	D	decanoate	0.95			0.045481	1-way ANOVA, Tukey HSD, compared with SDS	Tukey HSD	0.86	120
2	D	nonanoate	1.11			0.086307	1-way ANOVA, Tukey HSD, compared with buffer	Tukey HSD	0	80
2	D	nonanoate	1.11			0.086307	1-way ANOVA, Tukey HSD, compared with SDS	Tukey HSD	1	80
2	D	octanoate	2.15			0.109797	1-way ANOVA, Tukey HSD, compared with buffer	Tukey HSD	0	40
2	D	octanoate	2.15			0.109797	1-way ANOVA, Tukey HSD, compared with SDS	Tukey HSD	0	40
2	D	cis-2-dodecenoate	1.84			0.103958	1-way ANOVA, Tukey HSD, compared with buffer	Tukey HSD	0	40
2	D	cis-2-dodecenoate	1.84			0.103958	1-way ANOVA, Tukey HSD, compared with SDS	Tukey HSD	0	40
2	D	cis-2-decenoate	1.97			0.089113	1-way ANOVA, Tukey HSD, compared with buffer	Tukey HSD	0	40
2	D	cis-2-decenoate	1.97			0.089113	1-way ANOVA, Tukey HSD, compared with SDS	Tukey HSD	0	40
2	D	1-decanol	3.03			0.187956	1-way ANOVA, Tukey HSD, compared with buffer	Tukey HSD	0.98	40
2	D	1-decanol	3.03			0.187956	1-way ANOVA, Tukey HSD, compared with SDS	Tukey HSD	0	40
2	E	Saline buffer		0.162		NA	z-test, compared with samples below	Hochberg	See below	246
2	E	SDS		0.96		NA	z-test, compared with buffer	Hochberg	0	80
2	E	dodecanoate		0.73		NA	z-test, compared with buffer	Hochberg	0	81
2	E	dodecanoate		0.73		NA	z-test, compared with SDS	Hochberg	3.3e-05	81
2	E	undecanoate		0.71		NA	z-test, compared with buffer	Hochberg	0	41
2	E	undecanoate		0.71		NA	z-test, compared with SDS	Hochberg	0.00033	41
2	E	decanoate		0.63		NA	z-test, compared with buffer	Hochberg	0	86
2	E	decanoate		0.63		NA	z-test, compared with SDS	Hochberg	0	86
2	E	nonanoate		0.34		NA	z-test, compared with buffer	Hochberg	0.00054	120
2	E	nonanoate		0.34		NA	z-test, compared with SDS	Hochberg	0	120
2	E	1-dodecanol		0		NA	z-test, compared with buffer	Hochberg	0.024	40
2	E	1-dodecanol		0		NA	z-test, compared with SDS	Hochberg	0	40
2S2		All					1-way ANOVA, Tukey HSD		2e-16	800
2S2		Saline buffer	3.2			0.0644677	1-way ANOVA, Tukey HSD, compared with samples below	Tukey HSD	See below	120
2S2		1.5 mM SDS	0.99			0.0805	1-way ANOVA, Tukey HSD, compared with buffer	Tukey HSD	0	40
2S2		1.5 mM SDS	0.99			0.0805	1-way ANOVA, Tukey HSD, compared with SDS	Tukey HSD	1	40
2S2		1.0 mM SDS	1.01			0.0707	1-way ANOVA, Tukey HSD, compared with buffer	Tukey HSD	0	40
2S2		1.0 mM SDS	1.01			0.0707	1-way ANOVA, Tukey HSD, compared with SDS	Tukey HSD	1	40
2S2		0.6 mM SDS	1			0.0457	1-way ANOVA, Tukey HSD, compared with buffer	Tukey HSD	0	80
2S2		0.3 mM SDS	1.2			0.0926	1-way ANOVA, Tukey HSD, compared with buffer	Tukey HSD	0	40
2S2		0.3 mM SDS	1.2			0.0926	1-way ANOVA, Tukey HSD, compared with SDS	Tukey HSD	0.97	40
2S2		0.1 mM SDS	2.96			0.1108	1-way ANOVA, Tukey HSD, compared with buffer	Tukey HSD	1	40
2S2		0.1 mM SDS	2.96			0.1108	1-way ANOVA, Tukey HSD, compared with SDS	Tukey HSD	0	40
2S2		1.5 mM dodecanoate	1.07			0.11	1-way ANOVA, Tukey HSD, compared with buffer	Tukey HSD	0	40
2S2		1.5 mM dodecanoate	1.07			0.11	1-way ANOVA, Tukey HSD, compared with SDS	Tukey HSD	1	40
2S2		1.0 mM dodecanoate	1.71			0.0616	1-way ANOVA, Tukey HSD, compared with buffer	Tukey HSD	0	120
2S2		1.0 mM dodecanoate	1.71			0.0616	1-way ANOVA, Tukey HSD, compared with SDS	Tukey HSD	0	120
2S2		0.6 mM dodecanoate	3.41			0.147	1-way ANOVA, Tukey HSD, compared with buffer	Tukey HSD	0.79	40
2S2		0.6 mM dodecanoate	3.41			0.147	1-way ANOVA, Tukey HSD, compared with SDS	Tukey HSD	0	40
2S2		0.3 mM dodecanoate	3.61			0.227	1-way ANOVA, Tukey HSD, compared with buffer	Tukey HSD	0	40
2S2		0.3 mM dodecanoate	3.61			0.227	1-way ANOVA, Tukey HSD, compared with SDS	Tukey HSD	0	40
2S2		0.1 mM dodecanoate	2.7			0.116	1-way ANOVA, Tukey HSD, compared with buffer	Tukey HSD	0	40
2S2		0.1 mM dodecanoate	2.7			0.116	1-way ANOVA, Tukey HSD, compared with SDS	Tukey HSD	0	40
2S2		1.5 mM decanoate	0.92			0.09255	1-way ANOVA, Tukey HSD, compared with buffer	Tukey HSD	0	40
2S2		1.5 mM decanoate	0.92			0.09255	1-way ANOVA, Tukey HSD, compared with SDS	Tukey HSD	0.95	40
2S2		1.0 mM decanoate	1.2			0.0454	1-way ANOVA, Tukey HSD, compared with buffer	Tukey HSD	0	120
2S2		1.0 mM decanoate	1.2			0.0454	1-way ANOVA, Tukey HSD, compared with SDS	Tukey HSD	1	120
2S2		0.6 mM decanoate	0.96			0.0772	1-way ANOVA, Tukey HSD, compared with buffer	Tukey HSD	0	40
2S2		0.6 mM decanoate	0.96			0.0772	1-way ANOVA, Tukey HSD, compared with SDS	Tukey HSD	1	40
2S2		0.3 mM decanoate	1.33			0.0784	1-way ANOVA, Tukey HSD, compared with buffer	Tukey HSD	0	40
2S2		0.3 mM decanoate	1.33			0.0784	1-way ANOVA, Tukey HSD, compared with SDS	Tukey HSD	1	40
2S2		0.1 mM decanoate	3.05			0.184	1-way ANOVA, Tukey HSD, compared with buffer	Tukey HSD	0.99	40
2S2		0.1 mM decanoate	3.05			0.184	1-way ANOVA, Tukey HSD, compared with SDS	Tukey HSD	0	40
