# Supplementary material for: C. elegans avoids toxin-producing Streptomyces using a seven transmembrane domain chemosensory receptor
Source: eLife. 2017 Sep 5;6:e23770. doi: 10.7554/eLife.23770 (PMC5584987; doi:10.7554/eLife.23770)
Supplement: Figure 2—source data 2. [file elife-23770-fig2-data2.xlsx]

## Sheet: Sheet1
Pairwise Comparisons for Figure 2B
	saline buffer	3.4 mM SDS	0.6mM SDS	0.6mM Triton X-100
saline buffer
3.4 mM SDS	0
0.6mM SDS	0	0.479
0.6mM Triton X-100	0.000524	0	0
Pairwise Comparisons for Figure 2C
	saline buffer	SDS	sodium hexyl sulfate	1-dodecanol
saline buffer
SDS	0
sodium hexyl sulfate	3e-07	5.2e-05
1-dodecanol	0.649	0	0.00077
Pairwise Comparisons for Figure 2D
	saline buffer	SDS	dodecanoate	undecanoate	decanoate	nonanoate	octanoate	cis-2-dodecanoate	cis-2-decenoate	1-decanol
saline buffer
SDS	0
dodecanoate	0	0
undecanoate	0.00268	0	0
decanoate	0	0.862	0	0
nonanoate	0	1	0.000189	0	0.86
octanoate	0	0	0.00112	0.109	0	0
cis-2-dodecanoate	0	0	0.672	1.95e-05	0	8.9e-06	0.677
cis-2-decenoate	0	0	0.127	0.00122	0	1e-07	0.982	0.999
1-decanol	0.984	0	0	0.0229	0	0	2.4e-05	0	0
Pairwise Comparisons for Figure 2E
	saline buffer	SDS	dodecanoate	undecanoate	decanoate	nonanoate	1-dodecanol
saline buffer
SDS	0
dodecanoate	0	3.3e-05
undecanoate	0	0.00033	0.806
decanoate	0	0	0.495	0.758
nonanoate	0.000535	0	0	0.00033	0.00033
1-dodecanol	0.02384	0	0	0	0	0.00018
Pairwise Comparisons for Figure 2-figure supplement 2
	saline buffer	1.5 mM SDS	1.0 mM SDS	0.6 mM SDS	0.3 mM SDS	0.1 mM SDS	1.5 mM dodecanoate	1.0 mM dodecanoate	0.6 mM dodecanoate	0.3 mM dodecanoate	0.1 mM dodecanoate	1.5 mM decanoate	1.0 mM decanoate	0.6 mM decanoate	0.3 mM decanoate	0.1 mM decanoate
saline buffer
1.5 mM SDS	0
1.0 mM SDS	0	1
0.6 mM SDS	0	1	1
0.3 mM SDS	0	1	1	0.97
0.1 mM SDS	1	0	0	0	0
1.5 mM dodecanoate	0	1	1	1	1	0
1.0 mM dodecanoate	0	0.00096	0.0043	0	0.045	0	0.013
0.6 mM dodecanoate	0.79	0	0	0	0	1	0	0
0.3 mM dodecanoate	0	0	0	0	0	9.2e-06	0	0	0.0012
0.1 mM dodecanoate	0	4.3e-06	2e-05	0	0.00028	0	6.7e-05	0.6	0	0
1.5 mM decanoate	0	1	1	0.95	1	0	1	0.065	0	0	0.00045
1.0 mM decanoate	0	1	1	1	0.87	0	0.98	0	0	0	0	0.8
0.6 mM decanoate	0	1	1	1	1	0	1	0.00085	0	0	3.8e-06	1	1
0.3 mM decanoate	0	1	1	1	1	0	1	0.001	0	0	4.5e-06	1	1	1
0.1 mM decanoate	0.99	0	0	0	0	0.89	0	0	0.23	0	0.0002	0	0	0	0
