# Supplementary material for: C. elegans avoids toxin-producing Streptomyces using a seven transmembrane domain chemosensory receptor
Source: eLife. 2017 Sep 5;6:e23770. doi: 10.7554/eLife.23770 (PMC5584987; doi:10.7554/eLife.23770)
Supplement: Figure 4—source data 1. [file elife-23770-fig4-data1.xlsx]

## Sheet: Sheet1
Figure		Treatment	Mean Relative Response index	Percent Sensed	Mean Chemotaxis Index	Standard Error of the Mean	Statistical Test(s) and Comparison	Method of Multiple Test Correction	Post-hoc test-adjusted p-value	N
4	B	All					1-way ANOVA		2e-16	1040
4	B	Wild-type C. elegans, SDS	1			0.053236	1-way ANOVA, 2-sample t-test, compared with srb-6, SDS	Hochberg	8.00363e-17	80
4	B	srb-6 C. elegans, SDS	2.73			0.162186	1-way ANOVA, 2-sample t-test, compared with wild-type, SDS	Hochberg	8.00363e-17	80
4	B	Wild-type, S. avermitilis	1.07038			0.087996	1-way ANOVA, 2-sample t-test, compared with srb-6, S. avermitilis	Hochberg	2.8e-08	40
4	B	srb-6, S. avermitilis	2.77			0.23809	1-way ANOVA, 2-sample t-test, compared with wild-type, S. avermitilis	Hochberg	2.8e-08	40
4	B	Wild-type, S. costaricanus	1.33			0.107	1-way ANOVA, 2-sample t-test, compared with srb-6, S. costaricanus	Hochberg	2.4e-05	80
4	B	srb-6, S. costaricanus	2.03			0.1204	1-way ANOVA, 2-sample t-test, compared with wild-type, S. costaricanus	Hochberg	2.4e-05	80
4	B	Wild-type, S. milbemycinicus	1.04			0.0794644	1-way ANOVA, 2-sample t-test, compared with srb-6, S. milbemycinicus	Hochberg	0.00013	40
4	B	srb-6, S. milbemycinicus	2.02			0.2234	1-way ANOVA, 2-sample t-test, compared with wild-type, S. milbemycinicus	Hochberg	0.00013	40
4	B	Wild-type, decanoate	0.9483			0.045481	1-way ANOVA, 2-sample t-test, compared with srb-6, decanoate	Hochberg	7e-15	120
4	B	srb-6, decanoate	2.45924			0.151482	1-way ANOVA, 2-sample t-test, compared with wild-type, decanoate	Hochberg	7e-15	80
4	B	Wild-type, dodecanoate	1.59293			0.05926	1-way ANOVA, 2-sample t-test, compared with srb-6, dodecanoate	Hochberg	6.36e-11	120
4	B	srb-6, dodecanoate	3.24897			0.180946	1-way ANOVA, 2-sample t-test, compared with wild-type, dodecanoate	Hochberg	6.36e-11	40
4	C	Wild-type, buffer		0.162		NA	z-test, compared with srb-6, buffer	Hochberg	0.132	246
4	C	srb-6, buffer		0.0917		NA	z-test, compared with wild-type, buffer	Hochberg	0.132	120
4	C	Wild-type, SDS		0.9625		NA	z-test, compared with srb-6, SDS	Hochberg	0.21	80
4	C	srb-6, SDS		0.9524		NA	z-test, compared with wild-type, SDS	Hochberg	0.21	82
4	C	Wild-type, S. avermitilis		0.85		NA	z-test, compared with srb-6, S. avermitilis	Hochberg	2.6e-06	40
4	C	srb-6, S. avermitilis		0.3		NA	z-test, compared with wild-type, S. avermitilis	Hochberg	2.6e-06	40
4	C	Wild-type, S. costaricanus		0.87		NA	z-test, compared with srb-6, S. costaricanus	Hochberg	1.55e-05	40
4	C	srb-6, S. costaricanus		0.41		NA	z-test, compared with wild-type, S. costaricanus	Hochberg	1.55e-05	41
4	C	Wild-type, S. milbemycinicus		0.925		NA	z-test, compared with srb-6, S. milbemycinicus	Hochberg	4.6e-06	40
4	C	srb-6, S. milbemycinicus		0.45		NA	z-test, compared with wild-type, S. milbemycinicus	Hochberg	4.6e-06	40
4	C	Wild-type, dodecanoate		0.729		NA	z-test, compared with srb-6, dodecanoate	Hochberg	0.00162	81
4	C	srb-6, dodecanoate		0.467		NA	z-test, compared with wild-type, dodecanoate	Hochberg	0.00162	86
4	C	Wild-type, decanoate		0.6279		NA	z-test, compared with srb-6, decanoate	Hochberg	5.95e-08	86
4	C	srb-6, decanoate		0.1342		NA	z-test, compared with wild-type, decanoate	Hochberg	5.95e-08	82
4	D	All					1-way ANOVA		3.2e-21	485
4	D	Wild-type, SDS	1			0.0262774				280
4	D	Wild-type, S. avermitilis	0.92			0.0990355	1-way ANOVA, 2-sample t-test, compared with srb-6; ocr-2::srb-6, S. avermitilis	Hochberg	0.474	40
4	D	srb-6; ocr-2::srb-6, S. avermitilis	1.03			0.124	1-way ANOVA, 2-sample t-test, compared with wild-type, S. avermitilis	Hochberg	0.474	22
4	D	Wild-type, dodecanoate	1.59293			0.05926	1-way ANOVA, 2-sample t-test, compared with srb-6; ocr-2::srb-6, dodecanoate	Hochberg	0.0389	120
4	D	srb-6; ocr-2::srb-6, dodecanoate	1.26			0.146	1-way ANOVA, 2-sample t-test, compared with wild-type, dodecanoate	Hochberg	0.0389	23
4	E	Wild-type, buffer		0.16		NA				246
4	E	Wild-type, SDS		0.96		NA				80
4	E	Wild-type, S. avermitilis		0.85		NA	z-test, compared with srb-6, S. avermitilis	Hochberg	0.549	40
4	E	srb-6; ocr-2::srb-6, S. avermitilis		0.791		NA	z-test, compared with wild-type, S. avermitilis	Hochberg	0.549	24
4	E	Wild-type, dodecanoate		0.728		NA	z-test, compared with srb-6, dodecanoate	Hochberg	0.138	81
4	E	srb-6; ocr-2::srb-6, dodecanoate		0.875		NA	z-test, compared with wild-type, dodecanoate	Hochberg	0.138	24
4S1	A	All					1-way ANOVA, Tukey HSD	Tukey HSD	2e-16	1540
4S1	A	eri-1	1			0.032	1-way ANOVA, Tukey HSD, compared with samples below	Tukey HSD	See below	260
4S1	A	sra-13	1.54			0.118	1-way ANOVA, Tukey HSD, compared with eri-1	Tukey HSD	0.00099	40
4S1	A	sra-14	1.41			0.0973	1-way ANOVA, Tukey HSD, compared with eri-1	Tukey HSD	0.11	40
4S1	A	sra-39	1.3			0.0869	1-way ANOVA, Tukey HSD, compared with eri-1	Tukey HSD	0.38	40
4S1	A	srab-9	1.51			0.109	1-way ANOVA, Tukey HSD, compared with eri-1	Tukey HSD	0.0046	40
4S1	A	srab-11	1.41			0.0823	1-way ANOVA, Tukey HSD, compared with eri-1	Tukey HSD	0.01	60
4S1	A	srab-12	1.43			0.0583	1-way ANOVA, Tukey HSD, compared with eri-1	Tukey HSD	0.00054	80
4S1	A	srab-14	1			0.0856	1-way ANOVA, Tukey HSD, compared with eri-1	Tukey HSD	1	40
4S1	A	srab-20	1.69			0.106	1-way ANOVA, Tukey HSD, compared with eri-1	Tukey HSD	0	60
4S1	A	srb-3	1.09			0.07966	1-way ANOVA, Tukey HSD, compared with eri-1	Tukey HSD	1	40
4S1	A	srb-6	2			0.0544	1-way ANOVA, Tukey HSD, compared with eri-1	Tukey HSD	0	200
4S1	A	srd-15	1.2			0.0685	1-way ANOVA, Tukey HSD, compared with eri-1	Tukey HSD	1	40
4S1	A	sre-27	1.33			0.0933	1-way ANOVA, Tukey HSD, compared with eri-1	Tukey HSD	0.47	40
4S1	A	sre-31	1.03			0.0897	1-way ANOVA, Tukey HSD, compared with eri-1	Tukey HSD	1	40
4S1	A	sre-43	1.25			0.0809	1-way ANOVA, Tukey HSD, compared with eri-1	Tukey HSD	0.93	40
4S1	A	srg-7	1.28			0.07403	1-way ANOVA, Tukey HSD, compared with eri-1	Tukey HSD	0.46	60
4S1	A	srh-15	1.05			0.0847	1-way ANOVA, Tukey HSD, compared with eri-1	Tukey HSD	1	40
4S1	A	srh-18	1.14			0.0709	1-way ANOVA, Tukey HSD, compared with eri-1	Tukey HSD	1	40
4S1	A	srh-79	1.26			0.0794	1-way ANOVA, Tukey HSD, compared with eri-1	Tukey HSD	0.88	40
4S1	A	sru-38	0.95			0.0762	1-way ANOVA, Tukey HSD, compared with eri-1	Tukey HSD	1	40
4S1	A	srx-110	1.23			0.0856	1-way ANOVA, Tukey HSD, compared with eri-1	Tukey HSD	0.98	40
4S1	A	srxa-6	1.28			0.0803	1-way ANOVA, Tukey HSD, compared with eri-1	Tukey HSD	0.81	40
4S1	A	srxa-7	1.23			0.0696	1-way ANOVA, Tukey HSD, compared with eri-1	Tukey HSD	0.97	40
4S1	A	srxa-15	1.2			0.0794	1-way ANOVA, Tukey HSD, compared with eri-1	Tukey HSD	1	40
4S1	A	srz-1	1.21			0.0759	1-way ANOVA, Tukey HSD, compared with eri-1	Tukey HSD	0.94	60
4S1	A	str-90	1.23			0.0653	1-way ANOVA, Tukey HSD, compared with eri-1	Tukey HSD	0.97	40
4S1	B	All					1-way ANOVA, Tukey HSD	Tukey HSD	2e-16	1080
4S1	B	eri-1	1			0.032	1-way ANOVA, Tukey HSD, compared with samples below	Tukey HSD	See below	260
4S1	B	srb-2	1.14			0.0907	1-way ANOVA, Tukey HSD, compared with eri-1	Tukey HSD	1	40
4S1	B	srb-3	1.09			0.0796	1-way ANOVA, Tukey HSD, compared with eri-1	Tukey HSD	1	40
4S1	B	srb-4	1.14			0.086	1-way ANOVA, Tukey HSD, compared with eri-1	Tukey HSD	1	40
4S1	B	srb-5	1.26			0.0972	1-way ANOVA, Tukey HSD, compared with eri-1	Tukey HSD	0.67	40
4S1	B	srb-6	2			0.0544	1-way ANOVA, Tukey HSD, compared with eri-1	Tukey HSD	0	200
4S1	B	srb-7	1.24			0.0622	1-way ANOVA, Tukey HSD, compared with eri-1	Tukey HSD	0.28	80
4S1	B	srb-8	1.14			0.074	1-way ANOVA, Tukey HSD, compared with eri-1	Tukey HSD	1	40
4S1	B	srb-12	0.94			0.0664	1-way ANOVA, Tukey HSD, compared with eri-1	Tukey HSD	1	40
4S1	B	srb-13	1.45			0.077	1-way ANOVA, Tukey HSD, compared with eri-1	Tukey HSD	0.00066	60
4S1	B	srb-15	1.72			0.1186	1-way ANOVA, Tukey HSD, compared with eri-1	Tukey HSD	2e-07	40
4S1	B	srb-16	1.46			0.0936	1-way ANOVA, Tukey HSD, compared with eri-1	Tukey HSD	0.0089	40
4S1	B	srb-17	0.99			0.0609	1-way ANOVA, Tukey HSD, compared with eri-1	Tukey HSD	1	60
4S1	B	srb-18	1.39			0.0705	1-way ANOVA, Tukey HSD, compared with eri-1	Tukey HSD	0.009	60
4S1	B	srb-19	1.26			0.079	1-way ANOVA, Tukey HSD, compared with eri-1	Tukey HSD	0.68	40
