# Supplementary material for: C. elegans avoids toxin-producing Streptomyces using a seven transmembrane domain chemosensory receptor
Source: eLife. 2017 Sep 5;6:e23770. doi: 10.7554/eLife.23770 (PMC5584987; doi:10.7554/eLife.23770)
Supplement: Figure 4—source data 2. [file elife-23770-fig4-data2.xlsx]

## Sheet: Sheet1
Pairwise Comparisons for Figure 4-figure supplement 1 A
	eri-1	sra-13	sra-14	sra-39	srab-9	srab-11	srab-12	srab-14	srab-20	srb-3	srb-6	srd-15	sre-27	sre-31	sre-43	srg-7	srh-15	srh-18	srh-79	sru-38	srx-110	srxa-6	srxa-7	srxa-15	srz-1	str-90	296.573	192.559	551.091	334.565
eri-1
sra-13	0.000987
sra-14	0.105163	0.999999
sra-39	0.378081	1	1
srab-9	0.0046132	1	1	1
srab-11	0.0104553	1	1	1	1
srab-12	0.0005405	1	1	1	1	1
srab-14	1	0.0837403	0.637538	0.893671	0.1776	0.423876	0.237345
srab-20	0	1	0.959964	0.761152	1	0.887288	0.87975	0.0004073
srb-3	1	0.346395	0.948965	0.996694	0.551818	0.866901	0.711847	1	0.0061553
srb-6	0	0.054749	0.0004023	2.96e-05	0.0160664	0	0	0	0.373024	0
srd-15	0.995911	0.86279	1	1	0.959626	0.99932	0.995269	1	0.0966015	1	0
sre-27	0.469954	1	1	1	1	1	1	0.929014	0.6883	1	1.57e-05	1
sre-31	1	0.13065	0.752093	0.947436	0.257599	0.556442	0.348956	1	0.0008944	1	0	1	0.968173
sre-43	0.931155	0.971889	1	1	0.9959	1	1	1	0.251398	1	3e-07	1	1	1
srg-7	0.459942	0.978074	1	1	1	1	1	0.968934	0.18929	1	0	1	1	0.989658	1
srh-15	1	0.188311	0.839164	0.975838	0.346394	0.67605	0.467874	1	0.0017673	1	0	1	0.986803	1	1	0.996
srh-18	0.999992	0.588772	0.993232	1	0.7881	0.975228	0.917644	1	0.0231203	1	0	1	1	1	1	1	1
srh-79	0.884667	0.984136	1	1	0.9982	1	1	0.996097	0.312527	1	6e-07	1	1	1	1	1	1	1
sru-38	1	0.026313	0.363953	0.676238	0.0648894	0.183702	0.0791016	1	0	1	0	0.997	0.744044	1	0.974073	0.82453	1	1	0.956576
srx-110	0.976429	0.936974	1	1	0.986979	1	0.999363	1	0.168181	1	1e-07	1	1	1	1	1	1	1	1	0.990524
srxa-6	0.806919	0.992814	1	1	1	1	1	0.990657	0.396546	1	1.3e-06	1	1	1	1	1	1	1	1	0.925114	1
srxa-7	0.974914	0.93929	1	1	0.987663	1	1	1	0.17189	1	1e-07	1	1	1	1	1	1	1	1	0.989972	1	1
srxa-15	0.995156	0.870494	1	1	0.962913	1	0.995923	1	0.101484	1	0	1	1	1	1	1	1	1	1	0.997617	1	1	1
srz-1	0.937534	0.774858	1	1	0.924984	0.99814	0.985778	1	0.0327204	1	0	1	1	1	1	1	1	1	1	0.987044	1	1	1	1
str-90	0.972082	0.943197	1	1	0.988789	1	1	1	0.178524	1	1e-07	1	1	1	1	1	1	1	1	0.988943	1	1	1	1	1
Pairwise Comparisons for Figure 4-figure supplement 1 B
	eri-1	srb-2	srb-3	srb-4	srb-5	srb-6	srb-7	srb-8	srb-12	srb-13	srb-15	srb-16	srb-17	srb-18	srb-19
eri-1
srb-2	0.998
srb-3	1	1
srb-4	1	1	1
srb-5	0.670499	1	0.998	1
srb-6	0	0	0	0	2e-07
srb-7	0.277007	1	0.998	1	1	0
srb-8	0.997	1	1	1	1	0	1
srb-12	1	0.994	1	0.994	0.751363	0	0.599575	0.9927
srb-13	0.0006599	0.658263	0.406627	0.656754	0.9911	1.71e-05	0.922201	0.683636	0.0240499
srb-15	2e-07	0.0163825	0.0050829	0.0162719	0.17736	0.618008	0.0351281	0.018368	6.1e-05	0.863781
srb-16	0.0089464	0.748889	0.52387	0.747648	0.994	0.0011508	0.958381	0.769578	0.0550112	1	0.946436
srb-17	1	1	1	1	0.86444	0	0.720816	1	1	0.0253846	4.01e-05	0.0690541
srb-18	0.0090235	0.910438	0.730156	0.909676	1	6e-07	0.997	0.922743	0.0957857	1	0.576114	1	0.115469
srb-19	0.679439	1	1	1	1	2e-07	1	1	0.757501	0.990447	0.173322	0.993	0.869321	1
